# Supplementary material
Source: PubMed Central journal article supplement (PMC10023476)
Supplement: NIHMS1874040-supplement-5.pdf [file NIHMS1874040-supplement-5.pdf]

# CONFLICT OF INTEREST STATEMENT

## *The Journal of Arthroplasty*

(Adopted from the American Academy of Orthopaedic Surgeons disclosure statement)

The following form **must be filled out completely and submitted by each author (example, 6 authors, 6 forms). If no discloser is required, please write/type "none" at the end of each sentence.**

---

**Manuscript Title: Propensity scores: confounder adjustment when comparing non-randomized groups in orthopedic surgery**

1. Royalties from a company or supplier (The following conflicts were disclosed) none
2. Speakers bureau/paid presentations for a company or supplier (The following conflicts were disclosed) none
- 3A. Paid employee for a company or supplier (The following conflicts were disclosed) none
- 3B. Paid consultant for a company or supplier (The following conflicts were disclosed) none
- 3C. Unpaid consultants for a company or supplier (The following conflicts were disclosed) none
4. Stock or stock options in a company or supplier (The following conflicts were disclosed) none
5. Research support from a company or supplier as a Principal Investigator (The following conflicts were disclosed) none
6. Other financial or material support from a company or supplier (The following conflicts were disclosed) none
7. Royalties, financial or material support from publishers (The following conflicts were disclosed) none
8. Medical/Orthopaedic publications editorial/governing board (The following conflicts were disclosed) none
9. Board member/committee appointments for a society (The following conflicts were disclosed) none

**Each author must sign AND print or type his/her name, date and submit a separate form**

In addition, one BLINDED Conflict of Interest form (no author names used) should be submitted per manuscript with all author disclosures.

Isabella Zaniletti



8/5/2022

---

Author Name (Print or Type)

Author Signature

Date
